# Supplementary material
Source: PubMed Central journal article supplement (PMC8812193)
Supplement: 12866_2022_2450_MOESM1_ESM.pdf [file 12866_2022_2450_MOESM1_ESM.pdf]

## Additional file 1

### **Development and clinical evaluation of an up-converting phosphor technology-based point-of-care (UPT-POCT) assay for diagnosis of COVID-19 and rapid prediction of protective effect**

Pingping Zhang<sup>1, 2#</sup>, Baisheng Li<sup>3#</sup>, Yao Wang<sup>4#</sup>, Wei Min<sup>2#</sup>, Xiaohui Wang<sup>5#</sup>, Yugui Zhou<sup>1, 2#</sup>, Zhencui Li<sup>3</sup>, Yong Zhao<sup>1</sup>, Huan Zhang<sup>3</sup>, Min Jiang<sup>5</sup>, Huanying Zheng<sup>3</sup>, Chao Yang<sup>5</sup>, Wei Zhang<sup>3</sup>, LeZuo<sup>5</sup>, Qi Gao<sup>2</sup>, Zhengrong Yang<sup>5</sup>, Yanzhao Li<sup>2</sup>, Tiejian Feng<sup>5</sup>, Changqing Lin<sup>2\*</sup>, Qinghua Hu<sup>5\*</sup>, Tie Song<sup>3\*</sup>, Ruifu Yang<sup>1, 4\*</sup>

#### Author Affiliations:

<sup>1</sup>State Key Laboratory of Pathogen and Biosecurity, Beijing Institute of Microbiology and Epidemiology, Beijing 100071, P. R. China

<sup>2</sup>Beijing Key Laboratory of POCT for Bioemergency and Clinic (No. BZ0329), Beijing 100071, P. R. China

<sup>3</sup>Guangdong Provincial Center for Disease Control and Prevention, Guangzhou 511430, P. R. China

<sup>4</sup>Department of Clinical Laboratory, Peking Union Medical College Hospital, Peking Union Medical College, Chinese Academy of Medical Sciences, Beijing, 100032, People's Republic of China

<sup>5</sup>Shenzhen Center for Disease Control and Prevention, Shenzhen, P. R. China

#: These authors contributed equally to this work.

#### **\*Address for Correspondence**

Ruifu Yang, Beijing Institute of Microbiology and Epidemiology, No. 20, Dongdajie Street, Fengtai District, Beijing 100071, P. R. China. Email: ruifuyang@gmail.com

Tie Song, Guangdong Provincial Center for Disease Control and Prevention, Guangzhou 511430, P. R.

China. Email: [sjkzx\\_songtie@gd.gov.cn](mailto:sjkzx_songtie@gd.gov.cn)

Qinghua Hu, Shenzhen Center for Disease Control and Prevention, Shenzhen, P. R. China. Email:

[huqinghua@szcdc.net](mailto:huqinghua@szcdc.net)

Changqing Lin, Beijing Key Laboratory of POCT for Bioemergency and Clinic (No. BZ0329), Beijing

100071, P. R. China. Email: [changqing.lin@hotgen.com.cn](mailto:changqing.lin@hotgen.com.cn)

**Supplementary Tables**

**Table S1** Detection results for the serum sample from one convalescent COVID-19 patient.

| Sample size | Dilution fold    | T/C ratio of UPT |         | OD value of ELISA |         |
|-------------|------------------|------------------|---------|-------------------|---------|
|             |                  | MEAN             | SD      | MEAN              | SD      |
| 3           | Negative control | 0.175            | 0.015   | 1.00E-03          | 0.004   |
| 3           | 3200             | 0.211            | 0.006   | 0.009             | 0.007   |
| 3           | 1600             | 0.263            | 0.02146 | 0.033             | 0.00436 |
| 6           | 800              | 0.343            | 0.0097  | 0.084             | 0.01137 |
| 3           | 400              | 0.512            | 0.04277 | 0.164             | 0.007   |
| 3           | 200              | 0.761            | 0.05735 | 0.411             | 0.04291 |
| 3           | 100              | 1.45             | 0.09949 | 0.781             | 0.16901 |
| 3           | 50               | 3.09             | 0.34314 | 1.956             | 0.30453 |
| 3           | 25               | 4.291            | 0.07657 | 2.622             | 0.08271 |
| 3           | 12.5             | 8.154            | 0.264   | 2.794             | 0.01931 |
| 2           | 6.25             | 12.881           | 0.544   | 2.8835            | 0.05303 |

**Table S2** Detection results for 39 serum samples taken from 27 COVID-19 patients during the acute phase of illness

| Sample No. | Dilution Fold | T/C ratio of UPT |       | OD value of ELISA |       | Calculated T/C ratio* |
|------------|---------------|------------------|-------|-------------------|-------|-----------------------|
|            |               | MEAN             | SD    | MEAN              | SD    |                       |
| 1          | 100           | 1.417            | 0.089 | 0.685             | 0.136 | 1.274                 |
| 2          | 25            | 0.769            | 0.092 | 0.297             | 0.048 | 0.673                 |
| 3          | 100           | 0.738            | 0.091 | 0.577             | 0.062 | 1.107                 |
| 4          | 400           | 1.245            | 0.01  | 0.661             | 0.061 | 1.237                 |
| 5          | 100           | 1.253            | 0.109 | 0.8               | 0.071 | 1.452                 |
| 6          | 100           | 0.672            | 0.028 | 0.89              | 0.105 | 1.592                 |
| 7          | 100           | 2.279            | 0.259 | 2.167             | 0.202 | 3.57                  |
| 8          | 400           | 2.582            | 0.017 | 0.419             | 0.042 | 0.862                 |
| 9          | 100           | 0.83             | 0.14  | 0.743             | 0.061 | 1.364                 |
| 10         | 100           | 0.902            | 0.128 | 0.585             | 0.098 | 1.119                 |
| 11         | 100           | 0.376            | 0.03  | 0.178             | 0.007 | 0.489                 |
| 12         | 400           | 0.978            | 0.027 | 0.747             | 0.047 | 1.37                  |
| 13         | 100           | 2.546            | 0.098 | 2.132             | 0.051 | 3.515                 |
| 14         | 400           | 1.483            | 0.082 | 1.452             | 0.088 | 2.462                 |
| 15         | 400           | 1.04             | 0.046 | 0.433             | 0.006 | 0.884                 |
| 16         | 100           | 1.473            | 0.047 | 0.73              | 0.078 | 1.344                 |
| 17         | 100           | 3.51             | 0.179 | 1.286             | 0.328 | 2.205                 |
| 18         | 100           | 0.73             | 0.048 | 0.34              | 0.018 | 0.74                  |
| 19         | 100           | 2.859            | 0.102 | 1.13              | 0.059 | 1.963                 |

|    |     |       |       |       |       |       |
|----|-----|-------|-------|-------|-------|-------|
| 20 | 100 | 1.147 | 0.112 | 1.109 | 0.052 | 1.931 |
| 21 | 100 | 1.455 | 0.071 | 1.417 | 0.122 | 2.408 |
| 22 | 100 | 3.487 | 0.112 | 0.714 | 0.064 | 1.319 |
| 23 | 100 | 2.062 | 0.157 | 0.682 | 0.07  | 1.269 |
| 24 | 100 | 1.847 | 0.065 | 1.176 | 0.25  | 2.035 |
| 25 | 100 | 1.024 | 0.087 | 0.59  | 0.077 | 1.127 |
| 26 | 100 | 3.374 | 0.264 | 2.046 | 0.211 | 3.382 |
| 27 | 100 | 1.71  | 0.124 | 1.401 | 0.206 | 2.383 |
| 28 | 100 | 0.956 | 0.092 | 0.49  | 0.017 | 0.972 |
| 29 | 100 | 2.341 | 0.33  | 1.617 | 0.104 | 2.718 |
| 30 | 100 | 0.279 | 0.021 | 0.079 | 0.002 | 0.335 |
| 31 | 100 | 0.648 | 0.033 | 0.667 | 0.02  | 1.246 |
| 32 | 100 | 3.376 | 0.259 | 2.119 | 0.105 | 3.495 |
| 33 | 100 | 1.895 | 0.212 | 1.785 | 0.044 | 2.978 |
| 34 | 400 | 1.221 | 0.003 | 1.052 | 0.129 | 1.843 |
| 35 | 100 | 0.363 | 0.027 | 0.266 | 0.018 | 0.625 |
| 36 | 100 | 1.732 | 0.112 | 0.893 | 0.033 | 1.596 |
| 37 | 400 | 1.449 | 0.073 | 0.883 | 0.013 | 1.581 |
| 38 | 100 | 0.702 | 0.074 | 1.53  | 0.086 | 2.583 |
| 39 | 100 | 1.066 | 0.06  | 1.798 | 0.036 | 2.998 |

\* Calculated T/C ratio (y) = 1.549x + 0.213, where “x” is the OD value from an ELISA. This equation was obtained from the results of the convalescent serum samples.

**Table S3** Correlation between the T/C ratios and NAb titers for 528 serum samples from 312 COVID-19 patients

| Sample size | Neutralizing titer | MEAN of T/C | SD of T/C |
|-------------|--------------------|-------------|-----------|
| 16 (+1*)    | 1:4                | 0.859       | 0.669     |
| 46          | 1:8                | 1.166       | 0.846     |
| 54          | 1:16               | 1.901       | 1.073     |
| 140         | 1:32               | 2.735       | 1.860     |
| 75          | 1:64               | 4.062       | 2.450     |
| 103         | 1:128              | 5.019       | 2.941     |
| 40          | 1:256              | 5.917       | 3.335     |
| 33          | 1:512              | 7.230       | 2.936     |
| 14          | 1:1024             | 8.345       | 4.539     |
| 6           | >1:1024            | 13.753      | 3.894     |
| Total: 528  |                    |             |           |

Note: One serum sample with neutralizing titer of 1:4 and T/C ratio of 38.54 was excluded for calculation of average of T/C, but included in Spearman rank correlation analysis.

**Table S4** Correlation between the T/C ratios and RP rates

| Neutralizing titer | 1:4   | 1:8   | 1:16  | 1:32  | 1:64         | 1:128 | 1:256 | 1:512 | 1:1024 |
|--------------------|-------|-------|-------|-------|--------------|-------|-------|-------|--------|
| NRP cases          | 9     | 20    | 32    | 42    | 31           | 41    | 22    | 8     | 8      |
| RP cases           | 6     | 12    | 12    | 35    | 10           | 16    | 5     | 3     | 0      |
| Total              | 15    | 32    | 44    | 77    | 41           | 57    | 27    | 11    | 8      |
| RP rate            | 40%   | 38%   | 27%   | 45%   | 24%          | 28%   | 19%   | 27%   | 0%     |
| Mean of T/C ratio  | 0.738 | 1.246 | 1.960 | 3.287 | <b>4.380</b> | 5.546 | 6.204 | 6.339 | 9.689  |
| SD of T/C ratio    | 0.509 | 0.914 | 1.143 | 2.102 | <b>2.677</b> | 3.033 | 3.710 | 1.414 | 5.730  |

SD: Standard deviation

**Table S5** Correlation between the T/C ratios and accumulated RP (ARP) rates

| Neutralizing titer | Accumulated NRP cases (a) | ARP cases (b) | Cases included (a+b) | ARP rate (b/a+b) | Cases in proportion ((a+b) /312) | MEAN of T/C ratio | SD of T/C ratio |
|--------------------|---------------------------|---------------|----------------------|------------------|----------------------------------|-------------------|-----------------|
| ≥1:4               | 213                       | 99            | 312                  | 32%              | 100%                             | 0.738             | 0.509           |
| ≥1:8               | 204                       | 93            | 297                  | 31%              | 95%                              | 1.246             | 0.914           |
| ≥1:16              | 184                       | 81            | 265                  | 31%              | 85%                              | 1.960             | 1.143           |
| ≥1:32              | 152                       | 69            | 221                  | 31%              | 71%                              | 3.287             | 2.102           |
| ≥1:64              | 110                       | 34            | 144                  | 24%              | 46%                              | 4.380             | 2.677           |
| ≥1:128             | 79                        | 24            | 103                  | 23%              | 33%                              | 5.546             | 3.033           |
| ≥1:256             | 38                        | 8             | 46                   | 17%              | 15%                              | 6.204             | 3.710           |
| ≥1:512             | 16                        | 3             | 19                   | 16%              | 6%                               | 6.339             | 1.414           |
| ≥1:1024            | 8                         | 0             | 8                    | 0%               | 3%                               | 9.689             | 5.730           |

SD: Standard deviation

**Table S6** Correlation between the T/C ratios and protection rates against RP

| Neutralizing | Total – Accumulated | Protection rate | MEAN of | SD of T/C |
|--------------|---------------------|-----------------|---------|-----------|
|--------------|---------------------|-----------------|---------|-----------|

| titer   | RP  |      | T/C ratio | ratio |
|---------|-----|------|-----------|-------|
| ≥1:4    | 213 | 0.68 | 0.738     | 0.509 |
| ≥1:8    | 219 | 0.7  | 1.246     | 0.914 |
| ≥1:16   | 231 | 0.74 | 1.96      | 1.143 |
| ≥1:32   | 243 | 0.78 | 3.287     | 2.102 |
| ≥1:64   | 278 | 0.89 | 4.38      | 2.677 |
| ≥1:128  | 288 | 0.92 | 5.546     | 3.033 |
| ≥1:256  | 304 | 0.97 | 6.204     | 3.71  |
| ≥1:512  | 309 | 0.99 | 6.339     | 1.414 |
| ≥1:1024 | 312 | 1.00 | 9.689     | 5.73  |

SD: Standard deviation

Protection rate: (Total – Accumulated RP)/Total

**Table S7** Detection results for the serum samples from COVID-19-vaccinated people

| Sample size | Neutralizing titer | UPT-POCT assay    |       |
|-------------|--------------------|-------------------|-------|
|             |                    | MEAN of T/C ratio | SD    |
| 2           | 1:32               | 1.327             | 0.047 |
| 13          | 1:48               | 2.275             | 1.438 |
| 5           | 1:64               | 2.354             | 0.608 |
| 8           | 1:96               | 4.345             | 1.525 |
| 7           | 1:192              | 8.177             | 3.492 |
| Total: 35   |                    |                   |       |
